# Supplementary material
Source: Springer Nature journal article supplement (https://www.springermedizin.de/resource/supplementary/13020_2013_201_MOESM11_ESM.pdf/9641246)

### Error Metric Chart 1

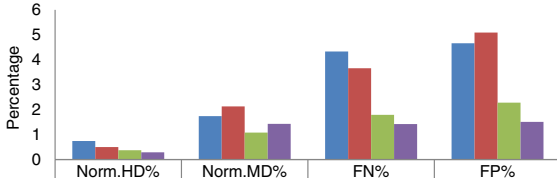

|             |      |      |      |      |
|-------------|------|------|------|------|
| Zhai et al. | 0.74 | 1.74 | 4.33 | 4.66 |
| Fu et al.   | 0.5  | 2.13 | 3.66 | 5.09 |
| C2G2FSnake  | 0.37 | 1.08 | 1.79 | 2.28 |
| DGF         | 0.29 | 1.43 | 1.42 | 1.51 |

### Error Metric Chart 2

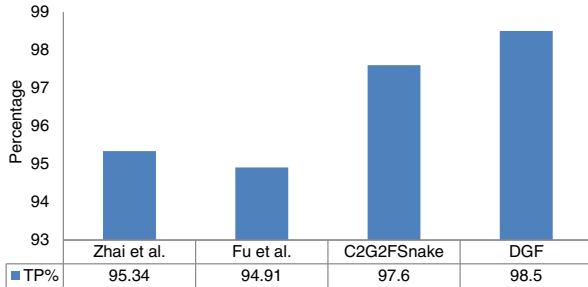

Supplement: MOESM11 [file 9641246]
